# Supplementary material for: Transgenerational effects of innate immune activation in broiler breeders on growth performance and immune responsiveness
Source: PubMed Central journal article supplement (PMC8531860; doi:10.1016/j.psj.2021.101413), 2021-07-30
Supplement: mmc1.pdf [file mmc1.pdf]

## SUPPLEMENTARY MATERIAL

### Materials & Methods

### Tables & Figures

#### Table S1

**Table S1.** Ingredient and nutritional composition of the starter, grower and finisher diets during the Grow-out phase.

|                                     | Starter | Grower | Finisher |
|-------------------------------------|---------|--------|----------|
| Soybean meal                        | 305.1   | 250.6  | 246.6    |
| Maize                               | 285.9   | 356.4  | 352.7    |
| Wheat                               | 200.0   | 200.0  | 200.0    |
| Soybeans, heat treated              | 80.0    | 80.0   | 80.0     |
| Rapeseed, solvent extracted         | 50.0    | 50.0   | 50.0     |
| Animal fat,                         | 20.1    | 16.1   | 20.5     |
| Soybean oil                         | 20.1    | 16.1   | 20.5     |
| Limestone                           | 14.76   | 11.78  | 11.81    |
| Monocalciumphosphate                | 6.69    | 2.51   | 2.58     |
| Sodiumbicarbonate                   | 2.6     | 2.66   | 1.99     |
| Salt                                | 1.9     | 1.93   | 1.88     |
| DL-Methionine                       | 2.14    | 1.53   | 1.29     |
| L-Lysine HCL                        | 0.51    | 0.37   | -        |
| L-Threonine                         | 0.11    | 0.00   | -        |
| Hostazym X 15000                    | 0.1     | 0.1    | 0.1      |
| Phyzyme XP 10000 TPT - 500 FTU      | 0.05    | 0.05   | 0.05     |
| Premix Broiler Starter <sup>1</sup> | 10      | -      | -        |
| Premix Broiler Grower <sup>2</sup>  | -       | 10     | 10       |
| CP                                  | 243     | 221    | 219      |
| Crude fat                           | 77      | 71     | 79       |
| Ash                                 | 0       | 0      | 0        |
| DM                                  | 888     | 884    | 885      |
| ME <sup>3</sup> , kcal/kg           | 2850    | 2900   | 2950     |
| Dig. Lys <sup>3</sup>               | 12.0    | 10.6   | 10.2     |
| Ca                                  | 8.8     | 6.8    | 6.8      |
| P                                   | 5.7     | 4.6    | 4.6      |
| CP                                  | 247     | 227    | 225      |
| Crude fat                           | 80      | 73     | 94       |
| DM                                  | 885     | 881    | 882      |

|    |     |     |     |
|----|-----|-----|-----|
| Ca | 8.2 | 6.5 | 6.7 |
| P  | 5.2 | 4.3 | 4.6 |

<sup>1</sup>Supplied per kg diet: thiamine, 1.0 mg; riboflavin, 4.5 mg; niacinamide, 40 mg; D-pantothenic acid, 9 mg; pyridoxine-HCL, 2.7 mg; choline chloride, 500 mg; cyanocobalamin, 20 µg; vitamin E (DL-α-tocopherol), 33 IU; menadione, 2.3 mg; vitamin A (retinyl-acetate), 12,000 IU; cholecalciferol, 5,000 IU; biotin, 100 µg; folic acid, 0.5 mg; FeSO<sub>4</sub>·H<sub>2</sub>O, 150 mg; MnO<sub>2</sub>, 100 mg; CuSO<sub>4</sub>·5H<sub>2</sub>O, 40 mg; ZnSo<sub>4</sub>·H<sub>2</sub>O, 145 mg; Na<sub>2</sub> SeO<sub>3</sub>, 0.56 mg; KI, 2.0 mg; antioxidant (oxytrap PXN), 125 mg.

<sup>2</sup>Supplied per kg diet: vitamin A (retinyl-acetate), 10,000 IU; vitamin D<sub>3</sub> (cholecalciferol), 2,000 IU; vitamin E (DL-α-tocopherol), 20 mg; vitamin K<sub>3</sub> (menadione), 2.3 mg; vitamin B<sub>1</sub> (thiamine), 0.8 mg; vitamin B<sub>2</sub> (riboflavin), 4.5 mg; vitamin B<sub>6</sub> (pyridoxine-HCL), 1.9 mg; vitamin B<sub>12</sub> (cyanocobalamin), 20 µg; niacine, 30 mg; D-pantothenic acid, 8 mg; choline chloride, 400 mg; folic acid, 0.5 mg; biotin, 50 µg; FeSO<sub>4</sub>·H<sub>2</sub>O, 150 mg; CuSO<sub>4</sub>·5H<sub>2</sub>O, 40 mg; MnO, 100 mg; ZnSo<sub>4</sub>·H<sub>2</sub>O, 145 mg; KI, 1.9 mg; Na<sub>2</sub>SeO<sub>3</sub>, 0.50 mg; antioxidant (oxytrap PXN), 125 mg

<sup>3</sup>calculated according to CVB (2018).

## **Table S2**

**Table S2.** Ingredient (g/kg) and nutritional composition of experimental diets during the broiler breeder phase.

|                                | <b>Control and LPS</b> | <b>β-glucan</b> |
|--------------------------------|------------------------|-----------------|
| Maize                          | 405.0                  | 404.5           |
| Wheat                          | 200.0                  | 200.0           |
| Soybean meal                   | 129.7                  | 129.7           |
| Wheat middlings                | 100.0                  | 100.0           |
| Sunflowerseed meal             | 50.0                   | 50.0            |
| Soybean oil                    | 22.3                   | 22.3            |
| Limestone                      | 76.3                   | 76.3            |
| Sodiumbicarbonate              | 2.57                   | 2.57            |
| Salt                           | 2.27                   | 2.27            |
| Monocalciumphosphate           | 0.40                   | 0.40            |
| DL-Methionine                  | 1.19                   | 1.19            |
| L-Threonine                    | 0.17                   | 0.17            |
| Hostazym X 15000               | 0.10                   | 0.10            |
| Phyzyme XP 10000 TPT - 500 FTU | 0.05                   | 0.05            |
| Premix <sup>1</sup>            | 10.0                   | 10.0            |
| β-glucan (MacroGard)           | -                      | 0.50            |
| CP                             | 157.0                  | 157.0           |
| Crude fat                      | 44.0                   | 44.0            |
| Ash                            | 105.0                  | 105.0           |
| DM                             | 889.0                  | 889.0           |
| ME <sup>2</sup> , kcal/kg      | 2850.0                 | 2850.0          |
| Dig. Lys <sup>2</sup>          | 5.7                    | 5.7             |
| Ca                             | 30.0                   | 30.0            |
| P                              | 4.2                    | 4.2             |
| CP                             | 157.4                  | 157.4           |
| Crude fat                      | 44.4                   | 44.4            |
| DM                             | 889.4                  | 889.4           |
| Ca                             | 30.0                   | 30.0            |
| P                              | 4.2                    | 4.2             |

<sup>1</sup>Supplied per kg diet: Vitamin A (retinyl-acetate), 12,500 IU; vitamin D3 (cholecalciferol), 2,500 IU; vitamin E (DL-α-tocopherol), 80 mg; vitamin K3 (menadione), 2.5 mg; vitamin B1 (thiamine), 2.0 mg; vitamin B2 (riboflavin), 9.0 mg; vitamin B6 (pyridoxine-HCL), 4.5 mg; vitamin B12 (cyanocobalamine), 30 µg; niacine, 40 mg; D-pantothenic acid, 12 mg; choline chloride, 600 mg; folic acid, 1.5 mg; biotin, 150 µg; FeSO4.H2O, 135 mg; CuSO4.5H2O, 40 mg; MnO, 130 mg; ZnSo4.H2O, 206 mg; KJ, 2.6 mg; Na2SeO3, 0.9 mg.

<sup>2</sup>calculated according to CVB (2018).

## **Materials & Methods**

### **Animals, Housing and Management**

#### **Broiler breeder phase (1)**

Diets were formulated based on digestibility and nutrient data provided by CVB (CVB. 2018b) in Bestmix (version 3.30.93). Diet composition was based on broiler breeder guide recommendations (version 2017, Aviagen-EPI, Roermond, The Netherlands) for the starter phase up to 5% lay and for the peak phase (5% lay to end of the trial). Feed was produced in mash form by Research Diet Services (Wijk bij Duurstede, the Netherlands). Target body weights were the same for all broiler breeders and followed breed recommendations (version 2017, Aviagen-EPI, Roermond, The Netherlands).

#### **Egg incubation phase (2)**

The eggs were stored at 20°C when stored for 3 days or 15°C when stored up to 6 days, room humidity was maintained between 70 and 80%. After 6 days, eggs were incubated at 37.5°C and 55% humidity using two incubators (NatureForm Inc., Jacksonville, FL). The 15 eggs per pen were distributed over 18 trays, with in each tray 6 blocks (collection day) with 15 eggs each. Broiler breeder pens were randomly allocated within blocks. After the setter period (d0 to d17 of incubation), eggs were transferred to baskets, based on the blocking and tray structure in the setter. From d19 to d21 of incubation, temperature was decreased to 36.7°C and 70.0% humidity.

#### **Grow-out phase (3)**

All treatments received the same diets, which were formulated based on digestibility and nutrient data provided by CVB (CVB. 2018b) in Bestmix (version 3.30.93). Diet composition was based on CVB recommendations for broilers: maximum growth (CVB. 2018a) and fed in three phases: starter (d0 to d7), grower (d7 to d21) and finisher (d21 to 35) (**Table S1**). All

diets were produced in pelleted form (2.5 mm starter and grower, 3.0 mm finisher) by Research Diet Services (the Netherlands).

## **Performance Data Collection**

### **Egg incubation phase (2)**

Chick quality was assessed using part of the score as described by Tona et al. (2003). Activity was scored 0 (good) or 6 (weak), down and appearance was scored 10 (clean and dry), 8 (wet) or 0 (dirty and wet) and the navel was scored 12 (closed and clean), 6 (not completely closed but not discolored) or 0 (not closed and discolored). The total score was calculated by adding the individual scores per chick. Subsequently, the same chicks were weighed, killed by cervical dislocation and dissected to measure residual yolk weight and calculate yolk free body mass (YFBM). Yolk weight as percentage of live body weight was calculated.

## **Immunological Data Collection**

### *Alamar blue assay*

Alamar blue (AB) is a non-toxic cell-permeable solution and was added to the cells directly after the collection of the culture media for the NO assay. Stock solution was made by dissolving 1 g of Resazurin Sodium Salt (BioReagent, R7017, Sigma-Aldrich Chemie GmbH, Schnelldorf, Germany) in 100 mL sterile PBS (Gibco) followed by sterile filtering through a 0.22  $\mu\text{m}$  pore size syringe filter (Acrodisc, Pall Laboratory Corporation, New York, NY, USA) and stored at  $-20^{\circ}\text{C}$  protected from light until further use. A 250x dilution in pre-warmed culture medium was used for the analysis with a total end volume of 100  $\mu\text{l}$  per well. Cells with AB solution were incubated at  $41^{\circ}\text{C}$  in 5%  $\text{CO}_2$  and 95% humidity for 4 hours protected from light. Reduction was quantified by measuring the optical density at 570 nm and 600 nm with a spectrophotometer at 0 h and 4 h (Multiscan<sup>TM</sup>, Thermo Fisher Scientific, Waltham, MA, USA). Percentage of reduced AB solution for both time point was calculated

using the following formula, based on AB assay manual (Biosource version PI-DAL1025/1100Rev 1.0, Invitrogen, Carlsbad, California, USA):

$$\text{percentage reduced} = \frac{(\epsilon_{\text{OX}})\lambda_2 A\lambda_1 - (\epsilon_{\text{OX}})\lambda_1 A\lambda_2}{(\epsilon_{\text{RED}})\lambda_1 A'\lambda_2 - (\epsilon_{\text{RED}})\lambda_2 A'\lambda_1}$$

$\lambda_1 = 570 \text{ nm}$   $\lambda_2 = 600 \text{ nm}$

$(\epsilon_{\text{OX}})\lambda_2$  = molar extinction coefficient of AlamarBlue oxidized form 600 nm

$(\epsilon_{\text{OX}})\lambda_1$  = molar extinction coefficient of AlamarBlue oxidized form 570 nm

$(\epsilon_{\text{RED}})\lambda_2$  = molar extinction coefficient of AlamarBlue reduced form 600 nm

$(\epsilon_{\text{RED}})\lambda_1$  = molar extinction coefficient of AlamarBlue reduced form 570 nm

$A\lambda_2$  = absorbance of test wells 600 nm

$A\lambda_1$  = absorbance of test wells 570 nm

$A\lambda_2'$  = absorbance of negative control well 600 nm

$A\lambda_1'$  = absorbance of negative control well 570 nm

## Results

### Table S3

**Table S3.** Effects of maternal treatment on egg and chick quality.

| Variable                  | Control | LPS   | $\beta$ -glucan | SEM   | P-Value | Average |
|---------------------------|---------|-------|-----------------|-------|---------|---------|
| Egg Weight Start, g       | 62.45   | 62.10 | 62.66           | 0.38  | 0.53    | 62.41   |
| Chick Weight d0, g        | 45.22   | 45.34 | 45.41           | 0.40  | 0.93    | 45.32   |
| YFBM, %                   | 39.54   | 39.52 | 39.71           | 0.34  | 0.87    | 39.59   |
| Relative Yolk Weight, %   | 12.35   | 12.50 | 11.66           | 0.36  | 0.18    | 12.17   |
| Tona Score <sup>1</sup>   | 17.49   | 17.28 | 17.40           | 15.17 | 0.55    | 17.39   |
| Fertility <sup>2</sup>    | 0.981   | 0.972 | 0.983           | 0.007 | 0.401   | 0.979   |
| Mortality <sup>2</sup>    | 0.043   | 0.030 | 0.045           | 0.009 | 0.415   | 0.040   |
| Hatchability <sup>2</sup> | 0.932   | 0.921 | 0.924           | 0.012 | 0.763   | 0.926   |

<sup>1</sup> Box-Cox transformation was applied to indicated variables owing to their non-normal distribution. Reported LSMMeans and Average have been back-transformed for ease of interpretation

<sup>2</sup>Probability of a lower score

### Table S4

**Table S4.** Broiler breeder phase (1): Relative mRNA expression (Age=week 36)

| Variable                       | Category       | Gene iNOS |         |       |         | Gene il1 $\beta$ |         |      |         |
|--------------------------------|----------------|-----------|---------|-------|---------|------------------|---------|------|---------|
|                                |                | n         | LSMeans | SEM   | P-value | n                | LSMeans | SEM  | P-value |
| Treatment                      | Control        | 23        | 0.027   | 0.003 | 0.4055  | 23               | 0.07    | 0.01 | 0.6999  |
|                                | LPS            | 22        | 0.028   | 0.003 |         | 22               | 0.08    | 0.01 |         |
|                                | $\beta$ glucan | 23        | 0.031   | 0.003 |         | 23               | 0.07    | 0.01 |         |
| <i>Ex vivo</i> LPS stimulation | 0              | 35        | 0.027   | 0.002 | 0.3275  | 35               | 0.04    | 0.01 | <0.0001 |
|                                | 10             | 33        | 0.030   | 0.002 |         | 33               | 0.11    | 0.01 |         |
| R-square model                 |                |           | 0.04    |       |         |                  | 0.43    |      |         |

### Table S5

**Table S5.** Broiler breeder phase (1): Nitric oxide production (Age=week 36)

| Variable                       | Category            | n  | LSMeans           | SEM  | P-value |
|--------------------------------|---------------------|----|-------------------|------|---------|
| Treatment                      | Control             | 48 | 1.94 <sup>b</sup> | 0.15 | 0.0117  |
|                                | LPS                 | 48 | 1.68 <sup>b</sup> | 0.15 |         |
|                                | $\beta$ glucan      | 48 | 2.31 <sup>a</sup> | 0.15 |         |
| <i>Ex vivo</i> LPS stimulation | 0                   | 36 | 0.59 <sup>a</sup> | 0.12 | <0.0001 |
|                                | 1                   | 36 | 1.19 <sup>b</sup> | 0.12 |         |
|                                | 10                  | 36 | 1.33 <sup>b</sup> | 0.12 |         |
|                                | 10+0.1 IFN $\gamma$ | 36 | 4.82 <sup>c</sup> | 0.12 |         |
| R-square model                 |                     |    | 0.74              |      |         |

a,b,c: different letters P < 0.05

## **Table S6**

**Table S6.** Grow-out phase (3): NE challenge lesion scores in percentage (Age=day 15)

| <b><i>E. maxima</i></b> |                    |                    |                    | <b><i>C. perfringens</i></b> |                    |                    |                   |
|-------------------------|--------------------|--------------------|--------------------|------------------------------|--------------------|--------------------|-------------------|
| Lesion score            | treatment          |                    |                    | Lesion score                 | treatment          |                    |                   |
|                         | Control            | LPS                | $\beta$ -glucan    |                              | Control            | LPS                | $\beta$ -glucan   |
| 0                       | 75.00              | 8.33               | 50.00              | 0                            | 75.00              | 66.67              | 100.00            |
| 1+2+3                   | 25.00 <sup>a</sup> | 91.67 <sup>b</sup> | 50.00 <sup>a</sup> | 1+2+3                        | 25.00 <sup>a</sup> | 33.33 <sup>a</sup> | 0.00 <sup>a</sup> |
| <b>Total</b>            | <b>100.0</b>       | <b>100.0</b>       | <b>100.0</b>       | <b>Total</b>                 | <b>100.0</b>       | <b>100.0</b>       | <b>100.0</b>      |
| 0                       | 75.00              | 8.33               | 50.00              | 0                            | 75.00              | 66.67              | 100.00            |
| 1                       | 8.33               | 33.33              | 41.67              | 1                            | 25.00              | 33.33              | 0.00              |
| 2                       | 0.00               | 58.33              | 8.33               | 2                            | 0.00               | 0.00               | 0.00              |
| 3                       | 16.67              | 0.00               | 0.00               | 3                            | 0.00               | 0.00               | 0.00              |
| <b>Total</b>            | <b>100.0</b>       | <b>100.0</b>       | <b>100.0</b>       | <b>Total</b>                 | <b>100.0</b>       | <b>100.0</b>       | <b>100.0</b>      |

## **Table S7**

**Table S7.** Grow-out phase (3): Relative mRNA expression (Age=day 21)

| Variable                       | Category        | Gene iNOS |         |       |         | Gene il1B |         |      |         |
|--------------------------------|-----------------|-----------|---------|-------|---------|-----------|---------|------|---------|
|                                |                 | n         | LSMeans | SEM   | P-value | n         | LSMeans | SEM  | P-value |
| Treatment                      | Control         | 23        | 0.044   | 0.009 |         | 20        | 0.41    | 0.06 | 0.0842  |
|                                | LPS             | 19        | 0.038   | 0.010 |         | 18        | 0.24    | 0.06 |         |
|                                | $\beta$ -glucan | 19        | 0.040   | 0.010 |         | 16        | 0.26    | 0.07 |         |
| <i>Ex vivo</i> LPS stimulation | 0               | 28        | 0.014   | 0.008 | <0.0001 | 21        | 0.01    | 0.06 | <0.0001 |
|                                | 10              | 33        | 0.068   | 0.008 |         | 33        | 0.60    | 0.05 |         |
| R-square model                 |                 |           | 0.30    |       |         |           | 0.59    |      |         |



## **References**

- CVB. 2018a. Tabellenboek veevoeding pluimvee.  
CVB. 2018b. Veevoedertabel.
